# Supplementary material for: Environmental tobacco smoke and carotid intima–media thickness in healthy children and adolescents: a systematic review
Source: HighWire-hosted journal article supplement (doi:10.1136/openhrt-2021-001790), 2022-01-01
Supplement: openhrt-2021-001790supp001_data_supplement.pdf [file openhrt-2021-001790supp001_data_supplement.pdf]

## Supplementary A

**NEWCASTLE - OTTAWA QUALITY ASSESSMENT SCALE****CASE CONTROL STUDIES**

Note: A study can be awarded a maximum of one star for each numbered item within the Selection and Exposure categories. A maximum of two stars can be given for Comparability.

**Selection**1) Is the case definition adequate?

- a) yes, with independent validation
- b) yes, eg record linkage or based on self reports
- c) no description

2) Representativeness of the cases

- a) consecutive or obviously representative series of cases
- b) potential for selection biases or not stated

3) Selection of Controls

- a) community controls
- b) hospital controls
- c) no description

4) Definition of Controls

- a) no history of disease (endpoint)
- b) no description of source

**Comparability**1) Comparability of cases and controls on the basis of the design or analysis

- a) study controls for \_\_\_\_\_ (Select the most important factor.)

b) study controls for any additional factor  (This criteria could be modified to indicate specific control for a second important factor.)

## **Exposure**

### 1) Ascertainment of exposure

- a) secure record (eg surgical records)
- b) structured interview where blind to case/control status
- c) interview not blinded to case/control status
- d) written self report or medical record only
- e) no description

### 2) Same method of ascertainment for cases and controls

- a) yes
- b) no

### 3) Non-Response rate

- a) same rate for both groups
- b) non respondents described
- c) rate different and no designation
